# Supplementary material
Source: Springer Nature journal article supplement (https://www.springermedizin.de/resource/supplementary/12936_2010_1332_MOESM7_ESM.pdf/9549540)

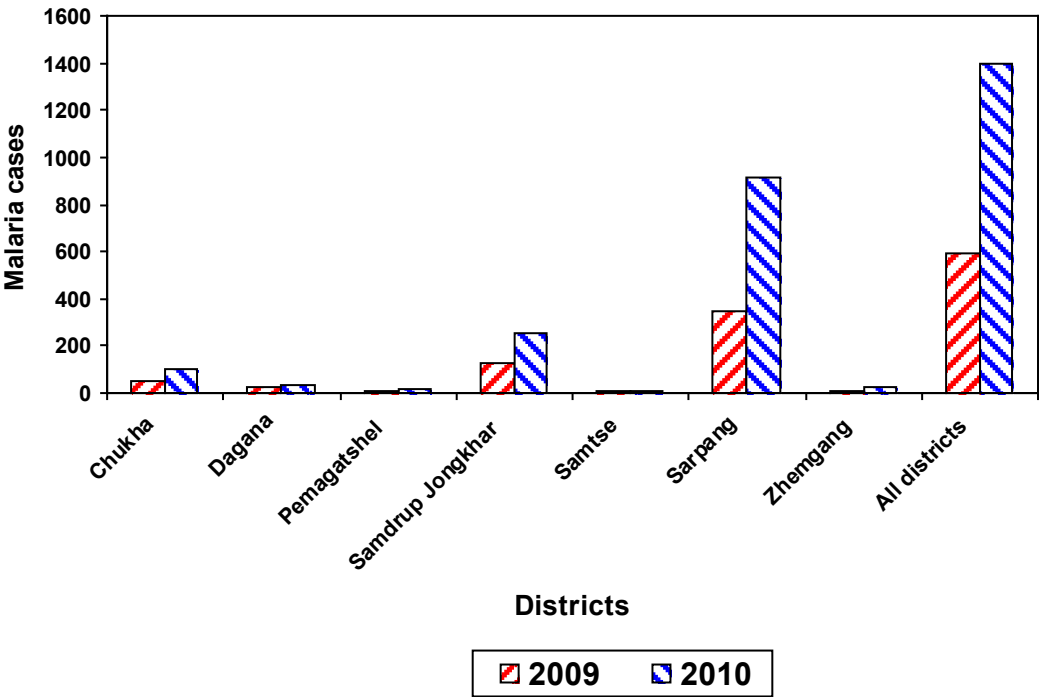

Supplement: MOESM7 [file 9549540]
